# Supplementary material for: Polygenic Risk: Predicting Depression Outcomes in Clinical and Epidemiological Cohorts of Youths
Source: Atypon-hosted journal article supplement (doi:10.1176/appi.ajp.2019.18091014), 2019-04-05
Supplement: appi.ajp.2019.18091014.ds001.pdf [file appi.ajp.2019.18091014.ds001.pdf]

Online supplement for Halldorsdottir et al., Polygenic Risk: Predicting Depression Outcomes in Clinical and Epidemiological Cohorts of Youths. *Am J Psychiatry* (doi: 10.1176/appi.ajp.2019.18091014)

## **Methods**

### **Participants**

*Clinical Cohort.* Cases were recruited from two child and adolescent clinics in Munich. Inclusion criteria for the cases at study entry was an MD disorder diagnosis based on standardized semi-structured clinical interview. Cases were recruited from two child and adolescent clinics in Munich. Inclusion criteria for the cases at study entry was a MD diagnosis based on ICD-10 using a standardized semi-structured clinical interview and intellectual capacity to complete clinical measures. To meet diagnostic criteria according to the ICD-10, the patient must suffer from persistent depressed mood, reduction of energy, and decreased activity. Other symptoms may include decreased enjoyment, interest, concentration and self-esteem and increased feelings of guilt and worthlessness. The depressed mood may also be accompanied by somatic symptoms such as disturbed sleep, psychomotor retardation, agitation, loss of appetite, weight loss, and loss of libido. Patients are diagnosed with mild, moderate or severe depressive episodes in accordance with the number and severity of the symptoms. The main difference between the DSM-5 and ICD-10 criteria for MD is the number of symptoms and their duration needed to meet criteria in the former (at least 5 clinically interfering symptoms present for  $\geq 2$  weeks) which the ICD-10 does not have and that the ICD-10 distinguishes between mild, moderate and severe depressive episodes based on the number and severity of the symptoms.

The control group was recruited through the clinic's website, flyers and local advertisement. Inclusion criteria for controls were no past or current mental disorder based on the Kinder-DIPS and intellectual capacity to complete clinical measures. Participants in the study received a 20 Euro voucher as compensation for participating in the study.

Childhood abuse was measured with four items on a self-report questionnaire(1) adapted from the Life Event Survey (2) and the Munich Event List (3). Specifically, participants were asked if any the following statement applied to them: 1) I have been yelled at or insulted at home; 2) I have been beaten up at home; 3) I have been the victim of violence; 4) Someone has tried to perform unwanted sexual acts to or with me. Each item was rated dichotomously ("yes"/"no").

*Epidemiological Cohort.* Participants were drawn from a larger study composed of 1,459 students between the ages 12 to 17 recruited from 31 schools in central Portugal in 2013-2014. Of those, 1,450 youth were successfully genotyped and completed the phenotypic measures required for the present study (see Table 1 for sample characteristics). Trained research assistants (master's students and licensed psychologists) administered the assessment battery in the school classroom setting. Following the study entry assessment, participants with elevated levels of depression entered an established prevention program targeting depressive symptoms (4, 5) and are not included in the

follow up analyses in the present study. In the current study, 694 participants with varying levels of depressive symptoms who did not enter the prevention study were tracked over time, with follow up assessments occurring at 6 months, 1-year and 2-years after study entry. An additional assessment occurred at 18-months following study entry. However, given the low participation rate at this timepoint (n = 138), it was not included in this study.

*Replication Epidemiological Cohort.* Participants were drawn from a larger longitudinal birth cohort study of 1,049 healthy singleton newborns born between 35 and 42 gestational weeks in 1998 in Helsinki, Finland (6, 7). DNA was extracted from blood samples (N=80) and saliva samples (N=277) donated at the 2009-2011 follow-up. In the current study, only genotyped participants with parental report on depressive symptoms at ages 8 and 11 years old were included. After quality control procedures, there were 185 youth with maternal report depressive symptoms and 144 participants with paternal report depressive symptoms at age 8 years old and 317 with maternal report and 236 with paternal report of depressive symptoms at age 11 years old.

### **Genotyping**

Genetic samples from both the German clinical and Portuguese epidemiological cohorts were genotyped using the Illumina Global Screening array at the MPIP and de-identified phenotypic data were also supplied to the researchers at MPIP for analyses. SNPs with Hardy-Weinberg equilibrium (HWE)  $< 0.0001$ , with a minor allele frequency (MAF)  $< 0.05$  or a call rate  $< 95\%$  were excluded following quality control. With the 469,592 SNPs in the clinical cohort and 459,810 SNPs in the epidemiological cohort surviving this quality control. Imputation for additional variants was performed using IMPUTE version 2(8) and the 1000 Genomes Project reference genome. Imputed SNPs were excluded if their posterior probability averages were less than 90% for the most likely imputed genotype (INFO  $\geq 0.9$ ). After the imputation process, SNPs with call rate  $< 98\%$ , HWE  $p < 0.0001$  and MAF  $< 0.05$  were excluded. This yielded a total of 3,984,898 SNPs in the clinical cohort and 3,779,545 SNPs in the epidemiological cohort.

In the replication epidemiological cohort, genotyping was performed using the OmniExpress Illumina array. SNPs with Hardy-Weinberg equilibrium (HWE)  $< 1 \times 10^{-6}$ , with a minor allele frequency (MAF)  $< 0.10$  or a call rate  $< 95\%$  were excluded. Moreover, heterozygosity, gender check and relatedness checks were performed and any discrepancies removed (N=2). This yielded a total of 529,505 SNPs.

Principal components (PCAs) to account for population stratification were calculated using genome-wide complex trait analysis(9). In all analyses, the first 6 PCAs were included to control for population stratification. MDs plots were used to inspect the samples for outliers and outliers more than four standard deviations from the mean were removed.

## Data Analysis

Sex differences in completion rates at the 2-year follow up were noted. To address any potential bias, sex was included in the imputation model and controlled for in all analyses. No other differences in terms of demographic and clinical characteristics in participants with completed versus non-completed data at study entry or at the follow up assessments were noted. Multiple imputation of missing data for all considered variables was conducted through the method of chained equations using the Multivariate Imputation by Chained Equations (MICE)(10) in R. The area under the curve (AUC) using survivalROC(11) and power analyses were calculated with avengeme in R(12).

In the polygenic risk score (PRS) analyses(13), the LD threshold was set to  $r^2 \leq 0.25$  and distance threshold was set to 2000 bp for clumping. After the imputation process, SNPs with  $MAF < 0.01$  were excluded; however, there was no further thresholding on MAF applied in the PRS analyses. Table S4 displays the number of SNPs included in each threshold.

In all analyses, depression PRS was a standardized given its small numerical size. In the clinical cohort, MD status was dichotomized (0=control, 1=case) and self-reported depressive symptoms and AAO were continuous measures. The DIKJ and BDI were transformed into z-scores using the 'scale' function in R in order to perform the analyses on the whole sample. In the epidemiological cohort, depressive symptoms were continuous measures in the cross-sectional analyses. In the survival analyses, depressive symptoms were dichotomized (none-mild depressive symptoms=0, moderate-severe depressive symptoms=1) and time was coded to reflect the duration between assessments (1=study entry, 2=6-month follow-up, 3=1-year follow-up, 5=2-year follow-up). Exposure to childhood abuse was dichotomized (0=no abuse/none-mild levels endorsed, 1=1 abuse type or more endorsed/moderate-severe levels of emotional, physical or sexual abuse endorsed). In all analyses, covariates were biological sex, chronological age, parental education, and the first six genetic principal components to adjust for population stratification. The interaction analyses of depression PRS and childhood abuse were adjusted for the covariates and the interaction terms of the depression PRS and childhood abuse with each covariate(14).

To examine the specificity of the effect, we ran the analyses using the summary statistics from the latest bipolar disorder (BPD) GWAS(14) to create the BPD PRS. At a p-value threshold of 0.05 (same as used for the depression PRS), the BPD PRS did not significantly predict case-control status ( $OR = 0.250$ ,  $p = 0.766$ ), depression severity ( $\beta = 0.002$ ,  $p = 0.964$ ) or age at onset ( $\beta = -0.035$ ,  $p = 0.688$ ) in the clinical cohort. These findings suggest that the predictive effect of genetic markers are specific to the depression PRS when it comes to predicting depression outcomes in youth.

### Figures

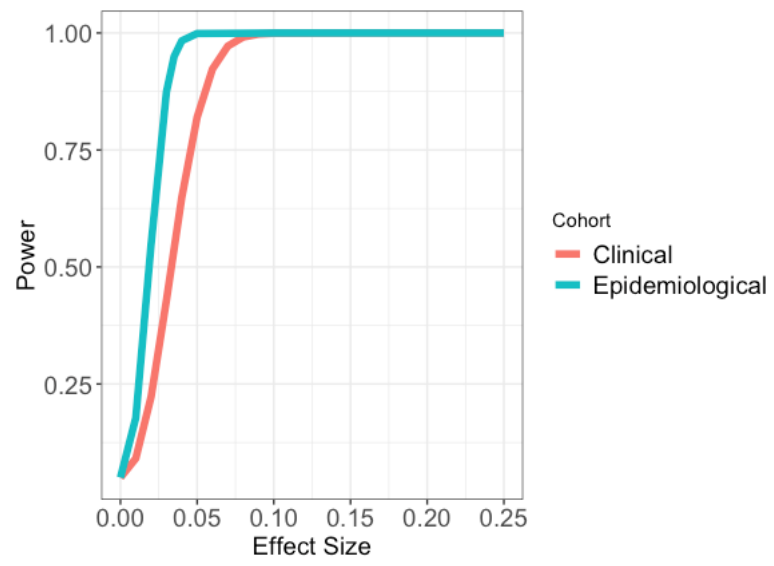

Figure S1. Power curve by effect size for the clinical cohort (red) and epidemiological cohort (blue).

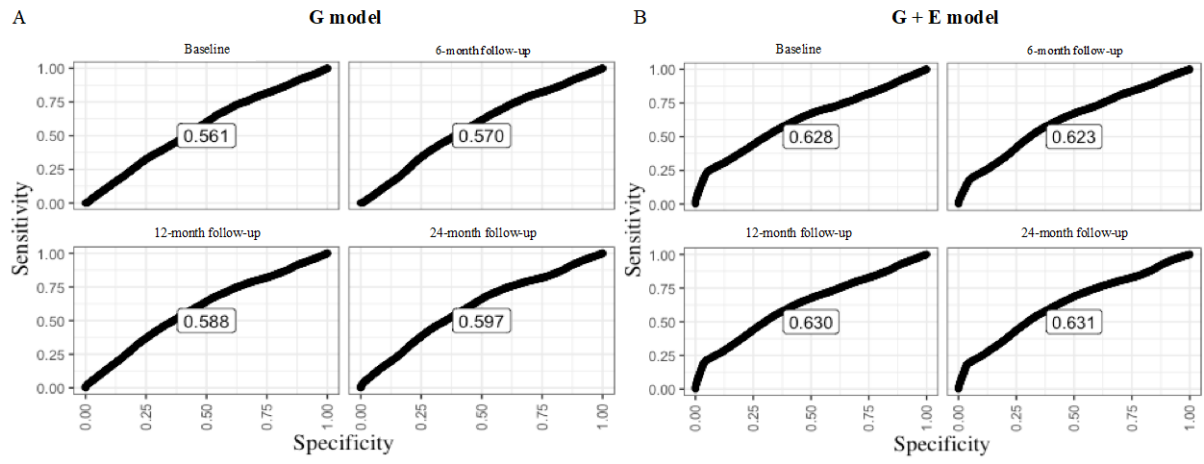

Figure S2. Sensitivity and specificity of the G model (A) and G + E model (B).

**Tables**

Table S1. Common comorbid diagnoses in the clinical cohort.

| Comorbid diagnosis             | N  | %     |
|--------------------------------|----|-------|
| Oppositional defiant disorder  | 26 | 9.32  |
| Conduct disorder               | 4  | 1.43  |
| Separation anxiety             | 10 | 3.58  |
| Specific phobia                | 39 | 13.98 |
| Social anxiety                 | 22 | 7.89  |
| Generalized anxiety disorder   | 11 | 3.94  |
| Post-traumatic stress disorder | 10 | 3.58  |
| Panic disorder                 | 4  | 1.43  |
| Agoraphobia                    | 4  | 1.43  |
| Dysthymia                      | 28 | 10.04 |

Table S2. Number of participants meeting diagnostic criteria for MD disorder based on a semi-structured clinical interview (A-LIFE) and within the moderate-severe range on the CDI at the follow-up assessments.

|                    | MD disorder |     | Moderate-severe depressive symptoms |      |
|--------------------|-------------|-----|-------------------------------------|------|
|                    | N           | %   | N                                   | %    |
| Study entry        | -           |     | 103                                 | 15.6 |
| 6-month follow-up  | 15          | 2.2 | 104                                 | 15.7 |
| 12-month follow-up | 14          | 2.1 | 78                                  | 11.8 |
| 24-month follow-up | 17          | 2.6 | 127                                 | 19.2 |

*Note.* CDI = Children's Depression Inventory; MD = major depression.

Table S3. Number of participants with available data for each outcome.

| Outcome                                     | N               | Mean  | SD    |
|---------------------------------------------|-----------------|-------|-------|
| <i>Clinical Cohort</i>                      |                 |       |       |
| Case-control status                         | 466 (279 cases) | -     | -     |
| Depression severity                         |                 |       |       |
| DIKJ                                        | 43              | 17.21 | 10.19 |
| BDI                                         | 291             | 19.44 | 15.66 |
| Age at onset                                | 245             | 12.56 | 2.49  |
| Abuse measure                               | 434             | -     |       |
| <i>Epidemiological Cohort 1</i>             |                 |       |       |
| <i>Baseline analyses (n = 1450)</i>         |                 |       |       |
| Depressive symptoms                         | 1425            | 11.46 | 7.68  |
| Childhood Trauma Questionnaire              | 1049            | 32.27 | 8.29  |
| <i>Longitudinal analyses (n = 694)</i>      |                 |       |       |
| Depressive symptoms at study entry          | 694             | 10.86 | 7.67  |
| Depressive symptoms at 6-month follow up    | 570             | 9.79  | 7.12  |
| Depressive symptoms at 1-year follow up     | 561             | 9.19  | 7.11  |
| Depressive symptoms at 2-year follow up     | 413             | 9.03  | 7.21  |
| <i>Epidemiological Cohort 2</i>             |                 |       |       |
| Depressive Problems t-score at 8 years-old  |                 |       |       |
| Maternal report                             | 184             | 52.70 | 4.40  |
| Paternal report                             | 144             | 52.02 | 3.95  |
| Depressive Problems t-score at 11 years-old |                 |       |       |
| Maternal report                             | 317             | 55.24 | 6.47  |
| Paternal report                             | 236             | 53.60 | 5.74  |

*Note.* Missing data was handled with multiple imputation using the software package *mice* in R. BDI = Beck Depression Inventory. DIKJ = Depression Inventory for Children and Adolescents.



Table S4. Number of SNPs used in the PRS calculations after clumping.

| p-value threshold | Number of SNPs  |                          |                          |
|-------------------|-----------------|--------------------------|--------------------------|
|                   | Clinical cohort | Epidemiological cohort 1 | Epidemiological cohort 2 |
| p < 5e-08         | 44              | 44                       | 44                       |
| p < 1e-05         | 237             | 233                      | 220                      |
| p < 1e-04         | 627             | 635                      | 558                      |
| p < 1e-03         | 1909            | 1891                     | 1775                     |
| p < 0.01          | 7008            | 7133                     | 6636                     |
| p < 0.05          | 19493           | 19962                    | 18128                    |
| p < 0.10          | 30954           | 31821                    | 28565                    |

Table S5. Summary of the findings from the null, main effect of PRS, additive, and interaction models with the childhood abuse cutoff of mild to severe in the epidemiological cohort.

| Outcome                                                     | Model      | Variable            | $\beta$ /HR | SE    | 95% confidence interval |        | $p_{FDR}$ | original $p$ -value | $R^2$ | Model comparison ( $p$ -value) |
|-------------------------------------------------------------|------------|---------------------|-------------|-------|-------------------------|--------|-----------|---------------------|-------|--------------------------------|
|                                                             |            |                     |             |       | Lower                   | Higher |           |                     |       |                                |
| <i>Depressive symptoms (<math>\beta</math>)</i>             |            |                     |             |       |                         |        |           |                     |       |                                |
|                                                             | Null model | -                   | -           | -     | -                       | -      | -         | -                   | -     | -                              |
|                                                             | G          | PRS                 | 0.557       | 0.200 | 0.167                   | 0.947  | 0.010     | 0.005               | 0.075 | 0.005                          |
|                                                             | G+E        | PRS                 | 0.421       | 0.193 | 0.043                   | 0.799  | 0.044     | 0.029               | 0.134 | 2.200e-16                      |
|                                                             |            | Childhood abuse     | 4.245       | 0.426 | 3.410                   | 5.079  | 6.00e-16  | 2.00e-16            |       |                                |
|                                                             | G×E        | PRS                 | 0.348       | 0.226 | -0.095                  | 0.791  | 0.149     | 0.124               | 0.134 | 0.535                          |
|                                                             |            | Childhood abuse     | 4.225       | 0.427 | 3.387                   | 5.062  | 6.00e-16  | 2.00e-16            |       |                                |
|                                                             |            | PRS*Childhood abuse | 0.264       | 0.424 | -0.;568                 | 1.095  | 0.534     | 0.534               |       |                                |
| <i>Prospective moderate-severe depressive symptoms (HR)</i> |            |                     |             |       |                         |        |           |                     |       |                                |
|                                                             | Null model | -                   | -           | -     | -                       | -      | -         | -                   | 0.035 | -                              |
|                                                             | G          | PRS                 | 1.202       | 0.071 | 1.045                   | 1.383  | 0.020     | 0.010               | 0.044 | 0.010                          |
|                                                             | G+E        | PRS                 | 1.192       | 0.076 | 1.027                   | 1.383  | 0.025     | 0.021               | 0.082 | 0.002                          |
|                                                             |            | Childhood abuse     | 2.347       | 0.154 | 1.748                   | 3.151  | 4.200e-05 | 1.400e-8            |       |                                |
|                                                             | G×E        | PRS                 | 1.143       | 0.085 | 1.748                   | 3.151  | 0.025     | 0.021               | 0.083 | 0.411                          |
|                                                             |            | Childhood abuse     | 2.347       | 1.504 | 0.968                   | 1.351  | 4.200e-05 | 1.400e-08           |       |                                |
|                                                             |            | PRS*Childhood abuse | 1.192       | 0.076 | 1.027                   | 1.383  | 0.116     | 0.116               |       |                                |

*Note.* Age, sex, parental education, and ancestry markers are controlled for in all the analyses. Null models contain only the covariates. The PRS at  $p$ -value threshold of 0.05 has been standardized in the models.

Table S6. Main effect of the depression PRS on maternal and paternal reported depressive symptoms in the replication epidemiological cohort of youth at ages 8 and 11 years old.

| Informant                        | N   | $\beta$ | SE    | $p$ -value | $R^2$ |
|----------------------------------|-----|---------|-------|------------|-------|
| <i>8 years old</i>               |     |         |       |            |       |
| Mother                           | 184 | 0.929   | 0.460 | 0.045      | 0.011 |
| Father                           | 144 | 0.138   | 0.161 | 0.391      | 0.001 |
| <i>11 years old</i>              |     |         |       |            |       |
| Mother                           | 317 | 0.196   | 0.141 | 0.164      | 0.045 |
| Father                           | 236 | 0.473   | 0.144 | 0.001      | 0.056 |
| Fisher combined probability test |     |         |       | 1.273e-3   |       |

Table S7. Major Depressive Disorder Working Group of the Psychiatric Genomics Consortium

Naomi R Wray 1. 2  
 Stephan Ripke 3. 4. 5  
 Manuel Mattheisen 6. 7. 8. 9  
 Maciej Trzaskowski\* 1  
 Enda M Byrne 1  
 Abdel Abdellaoui 10  
 Mark J Adams 11  
 Esben Agerbo 9. 12. 13  
 Tracy M Air 14  
 Till F M Andlauer 15. 16  
 Silviu-Alin Bacanu 17  
 Marie Bækvad-Hansen 9. 18  
 Aartjan T F Beekman 19  
 Tim B Bigdeli 17. 20  
 Elisabeth B Binder 15. 21  
 Douglas H R Blackwood 11  
 Julien Bryois 22  
 Henriette N Buttenschøn 8. 9.  
 23  
 Jonas Bybjerg-Grauholm 9. 18  
 Na Cai 24. 25  
 Enrique Castelao 26  
 Jane Hvarregaard Christensen  
 7. 8. 9  
 Toni-Kim Clarke 11  
 Jonathan R I Coleman 27  
 Lucía Colodro-Conde 28  
 Baptiste Couvy-Duchesne 29.  
 30  
 Nick Craddock 31  
 Gregory E Crawford 32. 33  
 Gail Davies 34  
 Ian J Deary 34  
 Franziska Degenhardt 35. 36  
 Eske M Derks 28  
 Nese Direk 37. 38  
 Conor V Dolan 10  
 Erin C Dunn 39. 40. 41  
 Thalia C Eley 27  
 Valentina Escott-Price 42  
 Farnush Farhadi Hassan  
 Kiadeh 43  
 Hilary K Finucane 44. 45  
 Andreas J Forstner 35. 36. 46.  
 47  
 Josef Frank 48  
 Héléna A Gaspar 27  
 Michael Gill 49  
 Fernando S Goes 50  
 Scott D Gordon 51  
 Jakob Grove 7. 8. 9. 52  
 Lynsey S Hall 11. 53  
 Christine Søholm Hansen 9. 18  
 Thomas F Hansen 54. 55. 56  
 Stefan Herms 35. 36. 47  
 Ian B Hickie 57  
 Per Hoffmann 35. 36. 47  
 Georg Homuth 58  
 Carsten Horn 59  
 Jouke-Jan Hottenga 10  
 David M Hougaard 9. 18  
 Marcus Ising 60  
 Rick Jansen 19. 19  
 Eric Jorgenson 61  
 James A Knowles 62  
 Isaac S Kohane 63. 64. 65  
 Julia Kraft 4  
 Warren W. Kretzschmar 66  
 Jesper Krogh 67  
 Zoltán Kutalik 68. 69  
 Yihan Li 66  
 Penelope A Lind 28  
 Donald J MacIntyre 70. 71  
 Dean F MacKinnon 50  
 Robert M Maier 2  
 Wolfgang Maier 72  
 Jonathan Marchini 73  
 Hamdi Mbarek 10  
 Patrick McGrath 74  
 Peter McGuffin 27  
 Sarah E Medland 28  
 Divya Mehta 2. 75  
 Christel M Middeldorp 10. 76.  
 77  
 Evelin Mihailov 78  
 Yuri Milaneshi 19. 19  
 Lili Milani 78  
 Francis M Mondimore 50  
 Grant W Montgomery 1  
 Sara Mostafavi 79. 80  
 Niamh Mullins 27  
 Matthias Nauck 81. 82  
 Bernard Ng 80  
 Michel G Nivard 10  
 Dale R Nyholt 83  
 Paul F O'Reilly 27  
 Hogni Oskarsson 84  
 Michael J Owen 85  
 Jodie N Painter 28  
 Carsten Bøcker Pedersen 9. 12.  
 13  
 Marianne Giørtz Pedersen 9.  
 12. 13  
 Roseann E. Peterson 17. 86  
 Erik Pettersson 22  
 Wouter J Peyrot 19  
 Giorgio Pistis 26  
 Danielle Posthuma 87. 88  
 Jorge A Quiroz 89  
 Per Qvist 7. 8. 9  
 John P Rice 90  
 Brien P. Riley 17  
 Margarita Rivera 27. 91  
 Saira Saeed Mirza 37  
 Robert Schoevers 92  
 Eva C Schulte 93. 94  
 Ling Shen 61  
 Jianxin Shi 95  
 Stanley I Shyn 96  
 Engilbert Sigurdsson 97  
 Grant C B Sinnamon 98  
 Johannes H Smit 19  
 Daniel J Smith 99  
 Hreinn Stefansson 100  
 Stacy Steinberg 100  
 Fabian Streit 48  
 Jana Strohmaier 48  
 Katherine E Tansey 101  
 Henning Teismann 102  
 Alexander Teumer 103  
 Wesley Thompson 9. 55. 104.  
 105  
 Pippa A Thomson 106  
 Thorgeir E Thorgeirsson 100  
 Matthew Traylor 107  
 Jens Treutlein 48  
 Vassily Trubetskoy 4  
 André G Uitterlinden 108  
 Daniel Umbricht 109  
 Sandra Van der Auwera 110  
 Albert M van Hemert 111  
 Alexander Viktorin 22  
 Peter M Visscher 1. 2  
 Yunpeng Wang 9. 55. 105  
 Bradley T. Webb 112  
 Shantel Marie Weinsheimer 9.  
 55  
 Jürgen Wellmann 102  
 Gonneke Willemsen 10  
 Stephanie H Witt 48  
 Yang Wu 1  
 Hualin S Xi 113  
 Jian Yang 2. 114  
 Futao Zhang 1  
 Volker Arolt 115  
 Bernhard T Baune 14  
 Klaus Berger 102  
 Dorret I Boomsma 10  
 Sven Cichon 35. 47. 116. 117  
 Udo Dannlowski 115  
 EJC de Geus 10. 118  
 J Raymond DePaulo 50  
 Enrico Domenici 119  
 Katharina Domschke 120  
 Tõnu Esko 5. 78

Hans J Grabe 110  
Steven P Hamilton 121  
Caroline Hayward 122  
Andrew C Heath 90  
Kenneth S Kendler 17  
Stefan Kloiber 60. 123. 124  
Glyn Lewis 125  
Qingqin S Li 126  
Susanne Lucae 60  
Pamela AF Madden 90  
Patrik K Magnusson 22  
Nicholas G Martin 51  
Andrew M McIntosh 11. 34  
Andres Metspalu 78. 127  
Ole Mors 9. 128  
Preben Bo Mortensen 8. 9. 12.  
13  
Bertram Müller-Myhsok 15.  
16. 129  
Merete Nordentoft 9. 130  
Markus M Nöthen 35. 36  
Michael C O'Donovan 85  
Sara A Paciga 131  
Nancy L Pedersen 22  
Brenda WJH Penninx 19  
Roy H Perlis 39. 132  
David J Porteous 106  
James B Potash 133  
Martin Preisig 26  
Marcella Rietschel 48  
Catherine Schaefer 61  
Thomas G Schulze 48. 94.  
134. 135. 136  
Jordan W Smoller 39. 40. 41  
Kari Stefansson 100. 137  
Henning Tiemeier 37. 138. 139  
Rudolf Uher 140  
Henry Völzke 103  
Myrna M Weissman 74. 141  
Thomas Werge 9. 55. 142  
Cathryn M Lewis 27. 143  
Douglas F Levinson 144  
Gerome Breen 27. 145  
Anders D Børglum 7. 8. 9  
Patrick F Sullivan 22. 146.  
147.

1. Institute for Molecular Bioscience. The University of Queensland. Brisbane. QLD. AU
2. Queensland Brain Institute. The University of Queensland. Brisbane. QLD. AU
3. Analytic and Translational Genetics Unit. Massachusetts General Hospital. Boston. MA. US
4. Department of Psychiatry and Psychotherapy. Universitätsmedizin Berlin Campus Charité Mitte. Berlin. DE
5. Medical and Population Genetics. Broad Institute. Cambridge. MA. US
6. Centre for Psychiatry Research. Department of Clinical Neuroscience. Karolinska Institutet. Stockholm. SE
7. Department of Biomedicine. Aarhus University. Aarhus. DK
8. iSEQ. Centre for Integrative Sequencing. Aarhus University. Aarhus. DK
9. iPSYCH. The Lundbeck Foundation Initiative for Integrative Psychiatric Research.. DK
10. Dept of Biological Psychology & EMGO+ Institute for Health and Care Research. Vrije Universiteit Amsterdam. Amsterdam. NL
11. Division of Psychiatry. University of Edinburgh. Edinburgh. GB
12. Centre for Integrated Register-based Research. Aarhus University. Aarhus. DK
13. National Centre for Register-Based Research. Aarhus University. Aarhus. DK
14. Discipline of Psychiatry. University of Adelaide. Adelaide. SA. AU
15. Department of Translational Research in Psychiatry. Max Planck Institute of Psychiatry. Munich. DE
16. Munich Cluster for Systems Neurology (SyNergy). Munich. DE
17. Department of Psychiatry. Virginia Commonwealth University. Richmond. VA. US
18. Center for Neonatal Screening. Department for Congenital Disorders. Statens Serum Institut. Copenhagen. DK
19. Department of Psychiatry. Vrije Universiteit Medical Center and GGZ inGeest. Amsterdam. NL
20. Virginia Institute for Psychiatric and Behavior Genetics. Richmond. VA. US
21. Department of Psychiatry and Behavioral Sciences. Emory University School of Medicine. Atlanta. GA. US
22. Department of Medical Epidemiology and Biostatistics. Karolinska Institutet. Stockholm. SE
23. Department of Clinical Medicine. Translational Neuropsychiatry Unit. Aarhus University. Aarhus. DK
24. Human Genetics. Wellcome Trust Sanger Institute. Cambridge. GB
25. Statistical genomics and systems genetics. European Bioinformatics Institute (EMBL-EBI). Cambridge. GB
26. Department of Psychiatry. University Hospital of Lausanne. Prilly. Vaud. CH
27. MRC Social Genetic and Developmental Psychiatry Centre. King's College London. London. GB
28. Genetics and Computational Biology. QIMR Berghofer Medical Research Institute. Herston. QLD. AU
29. Centre for Advanced Imaging. The University of Queensland. Saint Lucia. QLD. AU
30. Queensland Brain Institute. The University of Queensland. Saint Lucia. QLD. AU
31. Psychological Medicine. Cardiff University. Cardiff. GB
32. Center for Genomic and Computational Biology. Duke University. Durham. NC. US
33. Department of Pediatrics. Division of Medical Genetics. Duke University. Durham. NC. US
34. Centre for Cognitive Ageing and Cognitive Epidemiology. University of Edinburgh. Edinburgh. GB
35. Institute of Human Genetics. University of Bonn. Bonn. DE
36. Life&Brain Center. Department of Genomics. University of Bonn. Bonn. DE
37. Epidemiology. Erasmus MC. Rotterdam. Zuid-Holland. NL
38. Psychiatry. Dokuz Eylul University School Of Medicine. Izmir. TR
39. Department of Psychiatry. Massachusetts General Hospital. Boston. MA. US
40. Psychiatric and Neurodevelopmental Genetics Unit (PNGU). Massachusetts General Hospital. Boston. MA. US
41. Stanley Center for Psychiatric Research. Broad Institute. Cambridge. MA. US
42. Neuroscience and Mental Health. Cardiff University. Cardiff. GB

43. Bioinformatics. University of British Columbia. Vancouver. BC. CA
44. Department of Epidemiology. Harvard T.H. Chan School of Public Health. Boston. MA. US
45. Department of Mathematics. Massachusetts Institute of Technology. Cambridge. MA. US
46. Department of Psychiatry (UPK). University of Basel. Basel. CH
47. Human Genomics Research Group. Department of Biomedicine. University of Basel. Basel. CH
48. Department of Genetic Epidemiology in Psychiatry. Central Institute of Mental Health. Medical Faculty Mannheim. Heidelberg University. Mannheim. Baden-Württemberg. DE
49. Department of Psychiatry. Trinity College Dublin. Dublin. IE
50. Psychiatry & Behavioral Sciences. Johns Hopkins University. Baltimore. MD. US
51. Genetics and Computational Biology. QIMR Berghofer Medical Research Institute. Brisbane. QLD. AU
52. Bioinformatics Research Centre. Aarhus University. Aarhus. DK
53. Institute of Genetic Medicine. Newcastle University. Newcastle upon Tyne. GB
54. Danish Headache Centre. Department of Neurology. Rigshospitalet. Glostrup. DK
55. Institute of Biological Psychiatry. Mental Health Center Sct. Hans. Mental Health Services Capital Region of Denmark. Copenhagen. DK
56. iPSYCH. The Lundbeck Foundation Initiative for Psychiatric Research. Copenhagen. DK
57. Brain and Mind Centre. University of Sydney. Sydney. NSW. AU
58. Interfaculty Institute for Genetics and Functional Genomics. Department of Functional Genomics. University Medicine and Ernst Moritz Arndt University Greifswald. Greifswald. Mecklenburg-Vorpommern. DE
59. Roche Pharmaceutical Research and Early Development. Pharmaceutical Sciences. Roche Innovation Center Basel. F. Hoffmann-La Roche Ltd. Basel. CH
60. Max Planck Institute of Psychiatry. Munich. DE
61. Division of Research. Kaiser Permanente Northern California. Oakland. CA. US
62. Psychiatry & The Behavioral Sciences. University of Southern California. Los Angeles. CA. US
63. Department of Biomedical Informatics. Harvard Medical School. Boston. MA. US
64. Department of Medicine. Brigham and Women's Hospital. Boston. MA. US
65. Informatics Program. Boston Children's Hospital. Boston. MA. US
66. Wellcome Trust Centre for Human Genetics. University of Oxford. Oxford. GB
67. Department of Endocrinology at Herlev University Hospital. University of Copenhagen. Copenhagen. DK
68. Institute of Social and Preventive Medicine (IUMSP). University Hospital of Lausanne. Lausanne. VD. CH
69. Swiss Institute of Bioinformatics. Lausanne. VD. CH
70. Division of Psychiatry. Centre for Clinical Brain Sciences. University of Edinburgh. Edinburgh. GB
71. Mental Health. NHS 24. Glasgow. GB
72. Department of Psychiatry and Psychotherapy. University of Bonn. Bonn. DE
73. Statistics. University of Oxford. Oxford. GB
74. Psychiatry. Columbia University College of Physicians and Surgeons. New York. NY. US
75. School of Psychology and Counseling. Queensland University of Technology. Brisbane. QLD. AU
76. Child and Youth Mental Health Service. Children's Health Queensland Hospital and Health Service. South Brisbane. QLD. AU
77. Child Health Research Centre. University of Queensland. Brisbane. QLD. AU
78. Estonian Genome Center. University of Tartu. Tartu. EE
79. Medical Genetics. University of British Columbia. Vancouver. BC. CA
80. Statistics. University of British Columbia. Vancouver. BC. CA
81. DZHK (German Centre for Cardiovascular Research). Partner Site Greifswald. University Medicine. University Medicine Greifswald. Greifswald. Mecklenburg-Vorpommern. DE
82. Institute of Clinical Chemistry and Laboratory Medicine. University Medicine Greifswald. Greifswald. Mecklenburg-Vorpommern. DE



83. Institute of Health and Biomedical Innovation. Queensland University of Technology. Brisbane. QLD. AU
84. Humus. Reykjavik. IS
85. MRC Centre for Neuropsychiatric Genetics and Genomics. Cardiff University. Cardiff. GB
86. Virginia Institute for Psychiatric & Behavioral Genetics. Virginia Commonwealth University. Richmond. VA. US
87. Clinical Genetics. Vrije Universiteit Medical Center. Amsterdam. NL
88. Complex Trait Genetics. Vrije Universiteit Amsterdam. Amsterdam. NL
89. Solid Biosciences. Boston. MA. US
90. Department of Psychiatry. Washington University in Saint Louis School of Medicine. Saint Louis. MO. US
91. Department of Biochemistry and Molecular Biology II. Institute of Neurosciences. Center for Biomedical Research. University of Granada. Granada. ES
92. Department of Psychiatry. University of Groningen. University Medical Center Groningen. Groningen. NL
93. Department of Psychiatry and Psychotherapy. Medical Center of the University of Munich. Campus Innenstadt. Munich. DE
94. Institute of Psychiatric Phenomics and Genomics (IPPG). Medical Center of the University of Munich. Campus Innenstadt. Munich. DE
95. Division of Cancer Epidemiology and Genetics. National Cancer Institute. Bethesda. MD. US
96. Behavioral Health Services. Kaiser Permanente Washington. Seattle. WA. US
97. Faculty of Medicine. Department of Psychiatry. University of Iceland. Reykjavik. IS
98. School of Medicine and Dentistry. James Cook University. Townsville. QLD. AU
99. Institute of Health and Wellbeing. University of Glasgow. Glasgow. GB
100. deCODE Genetics / Amgen. Reykjavik. IS
101. College of Biomedical and Life Sciences. Cardiff University. Cardiff. GB
102. Institute of Epidemiology and Social Medicine. University of Münster. Münster. Nordrhein-Westfalen. DE
103. Institute for Community Medicine. University Medicine Greifswald. Greifswald. Mecklenburg-Vorpommern. DE
104. Department of Psychiatry. University of California. San Diego. San Diego. CA. US
105. KG Jebsen Centre for Psychosis Research. Norway Division of Mental Health and Addiction. Oslo University Hospital. Oslo. NO
106. Medical Genetics Section. CGEM. IGMM. University of Edinburgh. Edinburgh. GB
107. Clinical Neurosciences. University of Cambridge. Cambridge. GB
108. Internal Medicine. Erasmus MC. Rotterdam. Zuid-Holland. NL
109. Roche Pharmaceutical Research and Early Development. Neuroscience. Ophthalmology and Rare Diseases Discovery & Translational Medicine Area. Roche Innovation Center Basel. F. Hoffmann-La Roche Ltd. Basel. CH
110. Department of Psychiatry and Psychotherapy. University Medicine Greifswald. Greifswald. Mecklenburg-Vorpommern. DE
111. Department of Psychiatry. Leiden University Medical Center. Leiden. NL
112. Virginia Institute of Psychiatric & Behavioral Genetics. Virginia Commonwealth University. Richmond. VA. US
113. Computational Sciences Center of Emphasis. Pfizer Global Research and Development. Cambridge. MA. US
114. Institute for Molecular Bioscience; Queensland Brain Institute. The University of Queensland. Brisbane. QLD. AU
115. Department of Psychiatry. University of Münster. Münster. Nordrhein-Westfalen. DE
116. Institute of Medical Genetics and Pathology. University Hospital Basel. University of Basel. Basel. CH

117. Institute of Neuroscience and Medicine (INM-1). Research Center Juelich. Juelich. DE
118. Amsterdam Public Health Institute. Vrije Universiteit Medical Center. Amsterdam. NL
119. Centre for Integrative Biology. Università degli Studi di Trento. Trento. Trentino-Alto Adige. IT
120. Department of Psychiatry and Psychotherapy. Medical Center. University of Freiburg. Faculty of Medicine. University of Freiburg. Freiburg. DE
121. Psychiatry. Kaiser Permanente Northern California. San Francisco. CA. US
122. Medical Research Council Human Genetics Unit. Institute of Genetics and Molecular Medicine. University of Edinburgh. Edinburgh. GB
123. Department of Psychiatry. University of Toronto. Toronto. ON. CA
124. Centre for Addiction and Mental Health. Toronto. ON. CA
125. Division of Psychiatry. University College London. London. GB
126. Neuroscience Therapeutic Area. Janssen Research and Development. LLC. Titusville. NJ. US
127. Institute of Molecular and Cell Biology. University of Tartu. Tartu. EE
128. Psychosis Research Unit. Aarhus University Hospital. Risskov. Aarhus. DK
129. University of Liverpool. Liverpool. GB
130. Mental Health Center Copenhagen. Copenhagen University Hospital. Copenhagen. DK
131. Human Genetics and Computational Biomedicine. Pfizer Global Research and Development. Groton. CT. US
132. Psychiatry. Harvard Medical School. Boston. MA. US
133. Psychiatry. University of Iowa. Iowa City. IA. US
134. Department of Psychiatry and Behavioral Sciences. Johns Hopkins University. Baltimore. MD. US
135. Department of Psychiatry and Psychotherapy. University Medical Center Göttingen. Goettingen. Niedersachsen. DE
136. Human Genetics Branch. NIMH Division of Intramural Research Programs. Bethesda. MD. US
137. Faculty of Medicine. University of Iceland. Reykjavik. IS
138. Child and Adolescent Psychiatry. Erasmus MC. Rotterdam. Zuid-Holland. NL
139. Psychiatry. Erasmus MC. Rotterdam. Zuid-Holland. NL
140. Psychiatry. Dalhousie University. Halifax. NS. CA
141. Division of Epidemiology. New York State Psychiatric Institute. New York. NY. US
142. Department of Clinical Medicine. University of Copenhagen. Copenhagen. DK
143. Department of Medical & Molecular Genetics. King's College London. London. GB
144. Psychiatry & Behavioral Sciences. Stanford University. Stanford. CA. US
145. NIHR BRC for Mental Health. King's College London. London. GB
146. Genetics. University of North Carolina at Chapel Hill. Chapel Hill. NC. US
147. Psychiatry. University of North Carolina at Chapel Hill. Chapel Hill. NC. US

## References

1. Piechaczek CE, Pehl V, Feldmann L, Haberstroh S, QuickenstedtReinhardt P, Allgaier AK, Freisleder FJ, Schulte-Körne G, Greimel E. Psychosocial risk and protective factors for major depression in youth. under review.
2. Adams M, Adams J. Life events, depression, and perceived problem solving alternatives in adolescents. *Journal of Child Psychology and Psychiatry*. 1991;32:811-820.
3. Wittchen H-U, Essau CA, Hecht H, Teder W, Pfister H. Reliability of life event assessments: test—retest reliability and fall-off effects of the Munich interview for the assessment of life events and conditions. *Journal of affective disorders*. 1989;16:77-91.
4. Arnarson EO, Craighead WE. Prevention of depression among Icelandic adolescents: A 12-month follow-up. *Behaviour research and therapy*. 2011;49:170-174.
5. Arnarson EÖ, Craighead WE. Prevention of depression among Icelandic adolescents. *Behaviour research and therapy*. 2009;47:577-585.
6. Räikkönen K, Pesonen A-K, Heinonen K, Lahti J, Komsu N, Eriksson JG, Seckl JR, Järvenpää A-L, Strandberg TE. Maternal licorice consumption and detrimental cognitive and psychiatric outcomes in children. *American journal of epidemiology*. 2009;170:1137-1146.
7. Strandberg TE, Järvenpää A-L, Vanhanen H, McKeigue PM. Birth outcome in relation to licorice consumption during pregnancy. *American journal of epidemiology*. 2001;153:1085-1088.
8. Howie BN, Donnelly P, Marchini J. A flexible and accurate genotype imputation method for the next generation of genome-wide association studies. *PLoS genetics*. 2009;5:e1000529.
9. Yang J, Lee SH, Goddard ME, Visscher PM. Genome-wide complex trait analysis (GCTA): methods, data analyses, and interpretations. *Methods in molecular biology (Clifton, NJ)*. 2013;1019:215-236.
10. Buuren Sv, Groothuis-Oudshoorn K. mice: Multivariate imputation by chained equations in R. *Journal of statistical software*. 2010:1-68.
11. Heagerty PJ, Saha P. SurvivalROC: time-dependent ROC curve estimation from censored survival data. *Biometrics*. 2000;56:337-344.
12. Dudbridge F. Power and predictive accuracy of polygenic risk scores. *PLoS genetics*. 2013;9:e1003348.
13. Euesden J, Lewis CM, O'Reilly PF. PRSice: polygenic risk score software. *Bioinformatics (Oxford, England)*. 2014;31:1466-1468.
14. Keller MC. Gen $\times$  environment interaction studies have not properly controlled for potential confounders: the problem and the (simple) solution. *Biological psychiatry*. 2014;75:18-24.
